# Supplementary material
Source: PubMed Central journal article supplement (PMC6648333)
Supplement: ao9b00708_si_001.pdf [file ao9b00708_si_001.pdf]

Supporting Information

# Organic Thin Paper of Cellulose Nanofiber/Polyaniline Doped with ( $\pm$ )-10- Camphorsulfonic Acid Nanohybrid and its Application to Electromagnetic Shielding

*Taku Omura<sup>†,‡</sup>, Chi Hoong Chan<sup>†</sup>, Minato Wakisaka<sup>\*†</sup> and Haruo Nishida<sup>\*†</sup>*

<sup>†</sup>Graduate School of Life Science and Systems Engineering, Kyushu Institute of  
Technology, 2-4 Hibikino, Wakamatsu, Kitakyushu, Fukuoka 808-0196, Japan

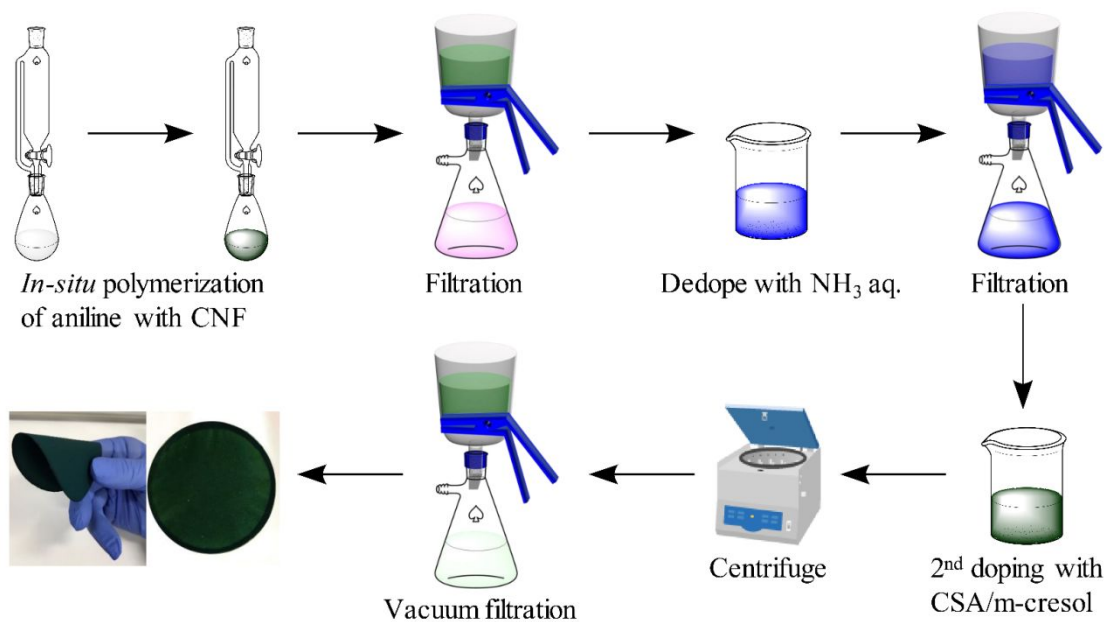

**Figure. S1.** Fabrication processes of PANI-CSA coated CNF paper.

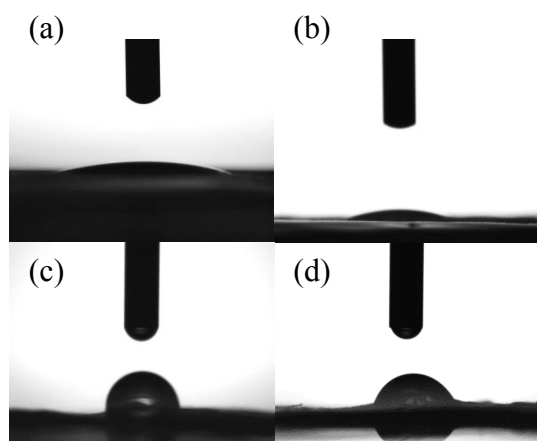

**Table S1.** Contact angle values of pristine CNF, modified CNF with PANI-Cl, PANI and PANI-CSA

| Sample              | Contact angle (°) |
|---------------------|-------------------|
| pristine CNF        | 12.1±2.4          |
| PANI-Cl coated CNF  | 19.0±5.5          |
| PANI coated CNF     | 69.9±10.5         |
| PANI-CSA coated CNF | 70.4±9.8          |

**Figure. S2.** Images of contact angle value of modified CNF to water droplet of (a) freeze-dry CNF, (b) PANI-Cl coated CNF, (c) dedoped-PANI coated CNF, (d) PANI-CSA coated CNF

**Table S2.** Assignments of the main peaks in the FTIR spectra of CNF, PANI(-Cl, -CSA) and PANI(-Cl, -CSA) coated CNF.

| Peak assignments                                           | Wavenumber / cm <sup>-1</sup> |           |      |      |                 |      |      |
|------------------------------------------------------------|-------------------------------|-----------|------|------|-----------------|------|------|
|                                                            | CNF                           | PANI      |      |      | PANI coated CNF |      |      |
|                                                            |                               | -Cl       | -    | -CSA | -Cl             | -    | -CSA |
| -OH stretching 1.                                          | 3340                          |           |      |      | 3430            | 3348 | 3400 |
| -CH stretching 1.                                          | 2890                          |           |      |      | 2900            | 2890 | 2890 |
| -CH <sub>2</sub> stretching 1.                             | 1640                          |           |      |      | 1600            | 1645 | 1660 |
| -OCH in-plane bending 2.                                   | 1430                          |           |      |      | 1438            | 1433 | 1410 |
| -CH bending 2.                                             | 1370                          |           |      |      | -               | 1368 | -    |
| C-O-C asymmetric stretching 1.                             | 1160                          |           |      |      | 1150            | 1165 | 1160 |
| C-O-C stretching 2.<br>vibration of anomeric carbon (C1)   | 1030                          |           |      |      | 1040            | 1035 | 1130 |
| 2.                                                         | 893                           |           |      |      | 883             | 897  | 883  |
| N-H stretching 2.                                          | -                             | 3000-3500 |      |      | 3000-3500       |      |      |
| C=O stretching vibration of dopant<br>CSA 3.               | -                             | -         | -    | 1730 | -               | -    | 1730 |
| C=C stretching vibration of quinoid<br>ring (N=Q=N) 3.4.   | -                             | 1550      | 1591 | 1560 | 1550            | 1592 | 1560 |
| C=C stretching vibration benzenoid<br>ring<br>(N-B-N) 3.4. | -                             | 1470      | 1500 | 1480 | 1470            | 1510 | 1470 |
| C-N stretching of secondary amine<br>1.                    | -                             | 1290      | 1308 | 1300 | 1290            | 1315 | 1290 |

|                                                      |      |      |      |      |      |      |
|------------------------------------------------------|------|------|------|------|------|------|
| C-N <sup>+</sup> in the polaron lattice 5.           | 1240 | 1244 | 1240 | 1240 | 1239 | 1240 |
| C-H bending of quinoid ring<br>(N=Q=N) 5. 6.         | 1130 | 1109 | 1140 | 1120 | 1109 | 1130 |
| C - H bending at<br>C1 and C4 of the benzene ring 1. | 795  | 826  | 802  | 798  | 826  | 802  |

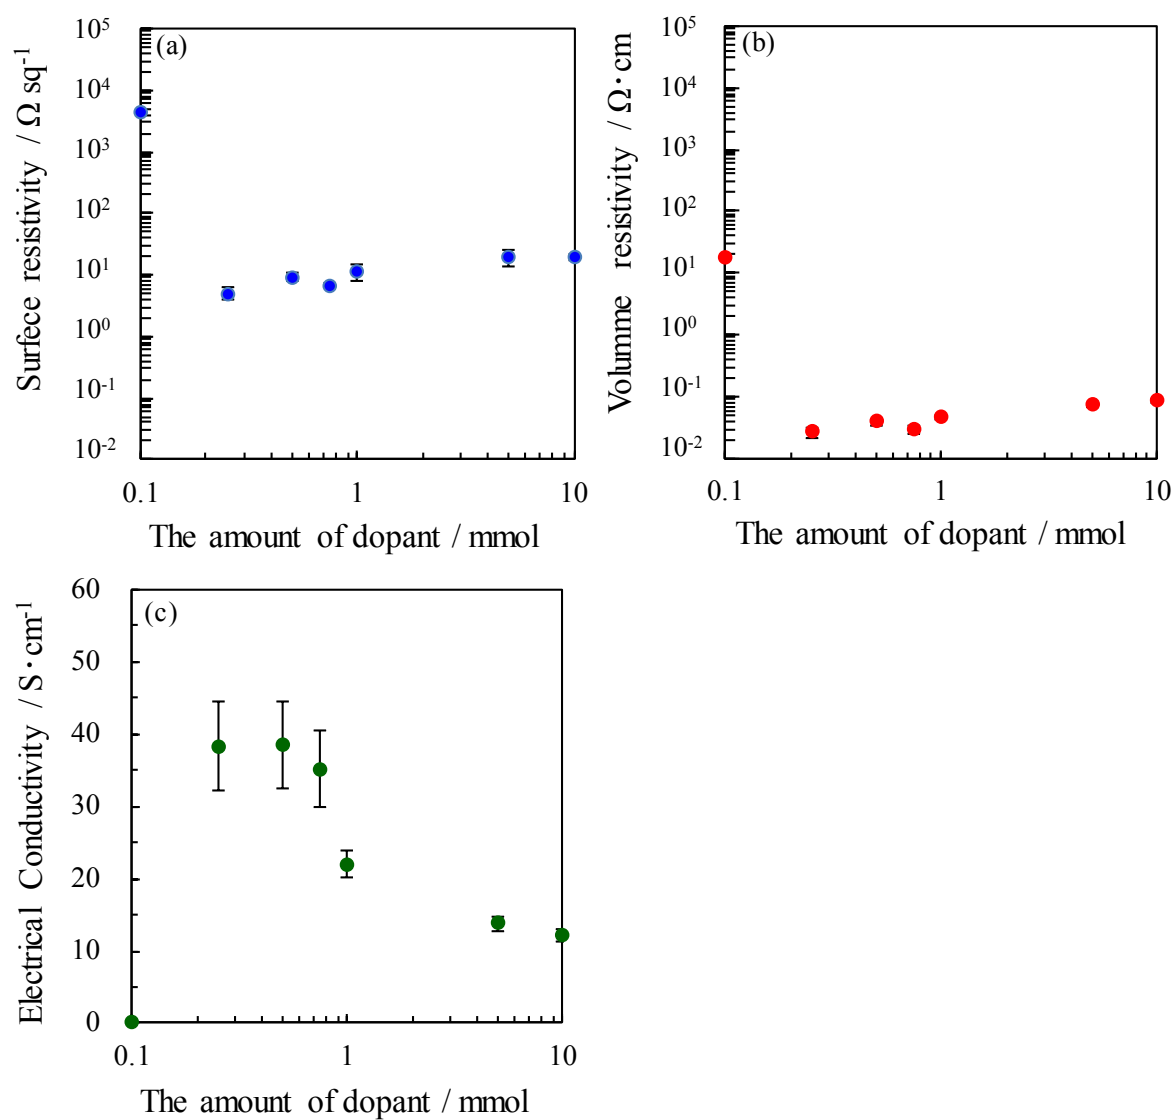

**Figure. S3.** Effect of the dopant amount on electrical properties of PANI-CSA coated CNF, (a) surface resistivity, (b) volume resistivity and (c) electrical conductivity.

**Table S3.** Summary of NCs and polyaniline hybrids conductivity

| No. | NCs Substrate | Conductive Materials | Method                        | Conductivity (S/cm)   | Refs.     |
|-----|---------------|----------------------|-------------------------------|-----------------------|-----------|
| 1   | BC            | PANI-Cl              | <i>In-situ</i> polymerization | $2.5 \times 10^{-2}$  | 47        |
| 2   | BC            | PANI-Cl              | <i>In-situ</i> polymerization | 0.9                   | 60        |
| 3   | BC            | PANI-DBSA            | <i>In-situ</i> polymerization | $1.61 \times 10^{-4}$ | 61        |
| 4   | CNF           | PANI-Cl              | <i>In-situ</i> polymerization | 0.075                 | 42        |
| 5   | CNF           | PANI-Cl              | <i>In-situ</i> polymerization | 3.38                  | 62        |
| 6   | CNF           | PANI-DBSA            | <i>In-situ</i> polymerization | 0.1                   | 63        |
| 7   | CNF           | PANI-Cl              | <i>In-situ</i> polymerization | 0.314                 | 40        |
| 8   | CNF           | PANI-Cl              | <i>In-situ</i> polymerization | 0.20                  | This work |
| 9   | CNF           | PANI-CSA             | <i>In-situ</i> polymerization | 38.5                  | This work |

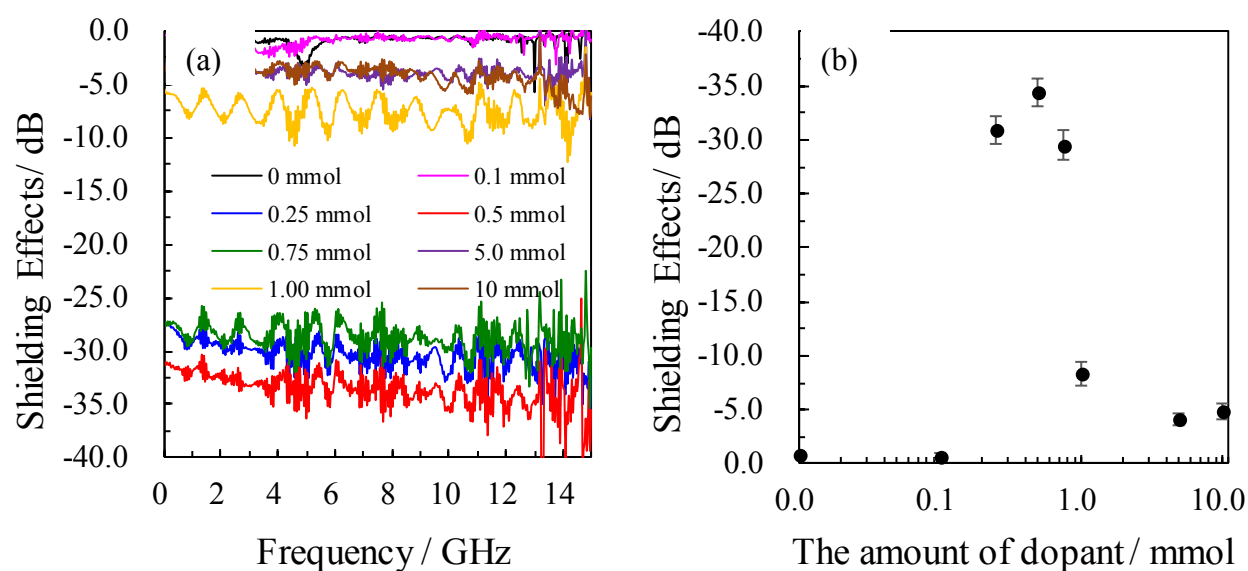**Figure. S4.** Effect of dopant amount on EMS properties of PANI-CSA coated CNF (a) and its value at 10GHz (b)
